# Supplementary material for: Dynamics and coherence of photoexcited states in polyfluorene films with ordered chain phases
Source: Royal Society of Chemistry journal article supplement (doi:10.1039/d2tc02770d), 2022-01-01
Supplement: d2tc02770d1.pdf [file d2tc02770d1.pdf]

Supporting information for:

# Dynamics and Coherence of Photoexcited States in Polyfluorene Films with Ordered Chain Phases

Andrés Felipe Quintero-Jaime<sup>a</sup>, Salma Hafed-Khatiri<sup>a</sup>, Francisco Huerta<sup>b</sup>, César  
Quijada<sup>b</sup>, Francisco Montilla<sup>\*,a</sup>

<sup>a</sup> Departamento de Química Física and Instituto Universitario de Materiales de Alicante  
(IUMA), Universidad de Alicante, Carretera San Vicente s/n, 03690, Alicante, Spain

<sup>b</sup> Departamento de Ingeniería Textil y Papelera, Universitat Politècnica de València,  
Plaza Ferrandiz y Carbonell, 1, E-03801, Alcoy, Spain

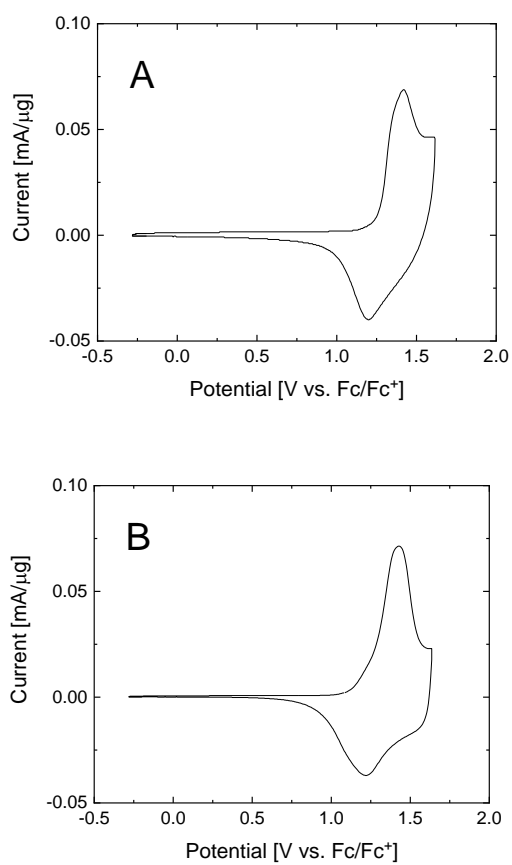

**Fig. S1.** Stabilized cyclic voltammograms of PFO deposited on an ITO substrate in 0.1 M TBA in ACN solution at  $100 \text{ mV s}^{-1}$  with: A)  $\alpha$ -phase and B)  $\beta$ -phase.

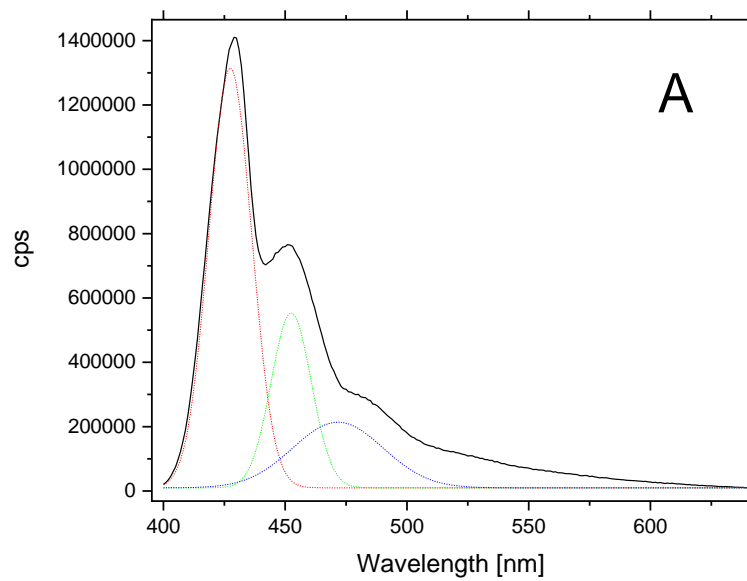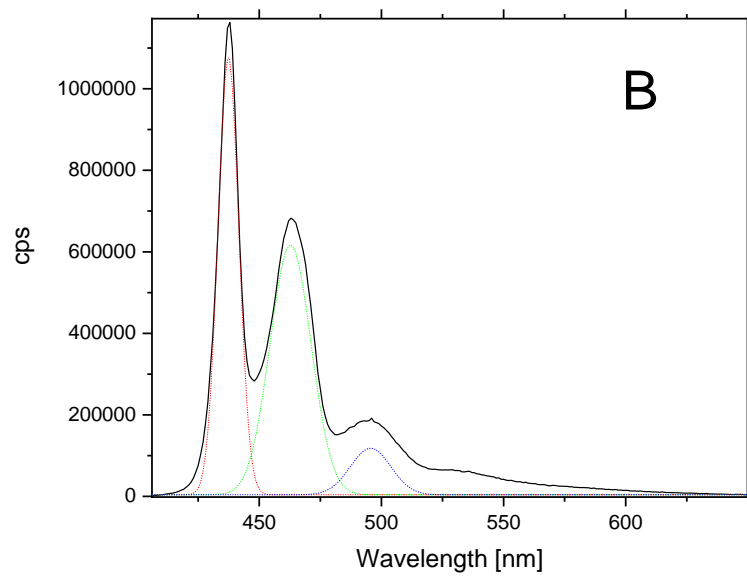

**Fig. S2.** Deconvolution of fluorescence spectra of glassy (A) and  $\beta$ -containing phase (B) PFO.

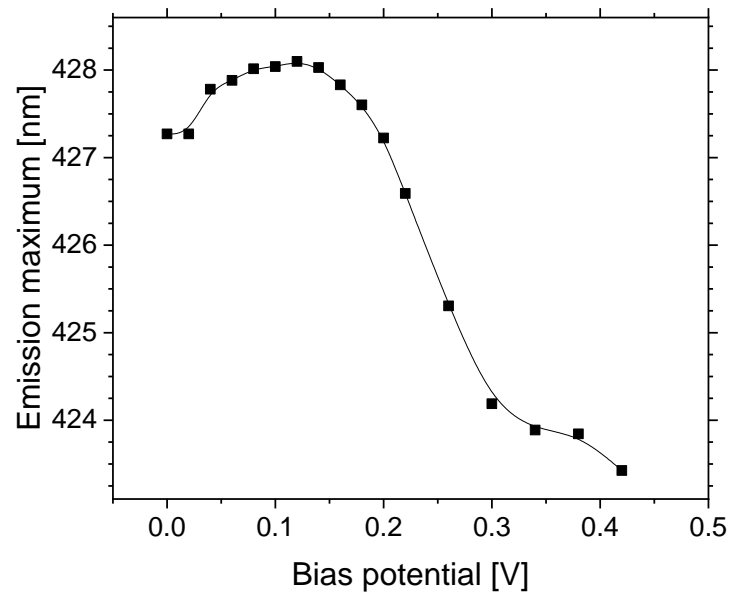

**Figure S3:** Evolution of the 0-0 transition of PL spectra for glassy PFO at different bias potential.

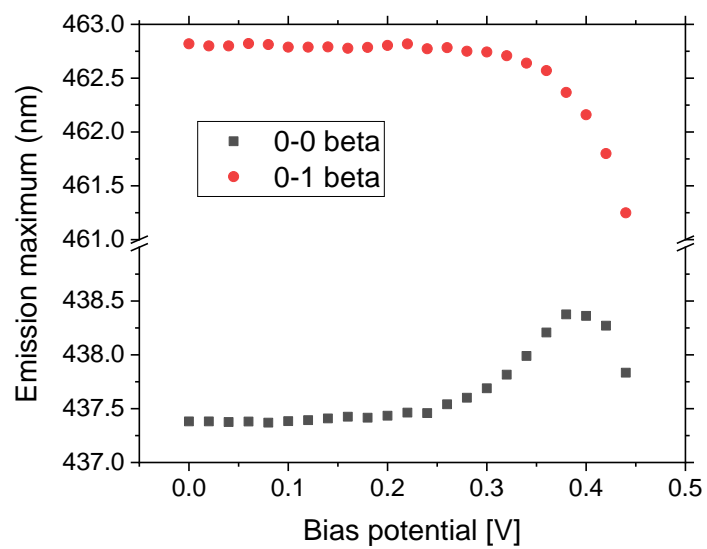

**Figure S4:** Evolution of the 0-0 and 0-1 transitions of PL spectra for  $\beta$ -containing PFO at different bias potential.
